# Supplementary material for: Plasma iron controls neutrophil production and function
Source: PubMed Central journal article supplement — Sci Adv. 2022 Oct 5;8(40):eabq5384. doi: 10.1126/sciadv.abq5384 (PMC9534512; doi:10.1126/sciadv.abq5384), 2022-10-05
Supplement: sciadv.abq5384_sm.pdf [file sciadv.abq5384_sm.pdf]

Supplementary Materials for  
**Plasma iron controls neutrophil production and function**

Joe N. Frost *et al.*

Corresponding author: Hal Drakesmith, [alexander.drakesmith@imm.ox.ac.uk](mailto:alexander.drakesmith@imm.ox.ac.uk)

*Sci. Adv.* **8**, eabq5384 (2022)  
DOI: 10.1126/sciadv.abq5384

**This PDF file includes:**

Figs. S1 to S4  
Table S1

Figure S1

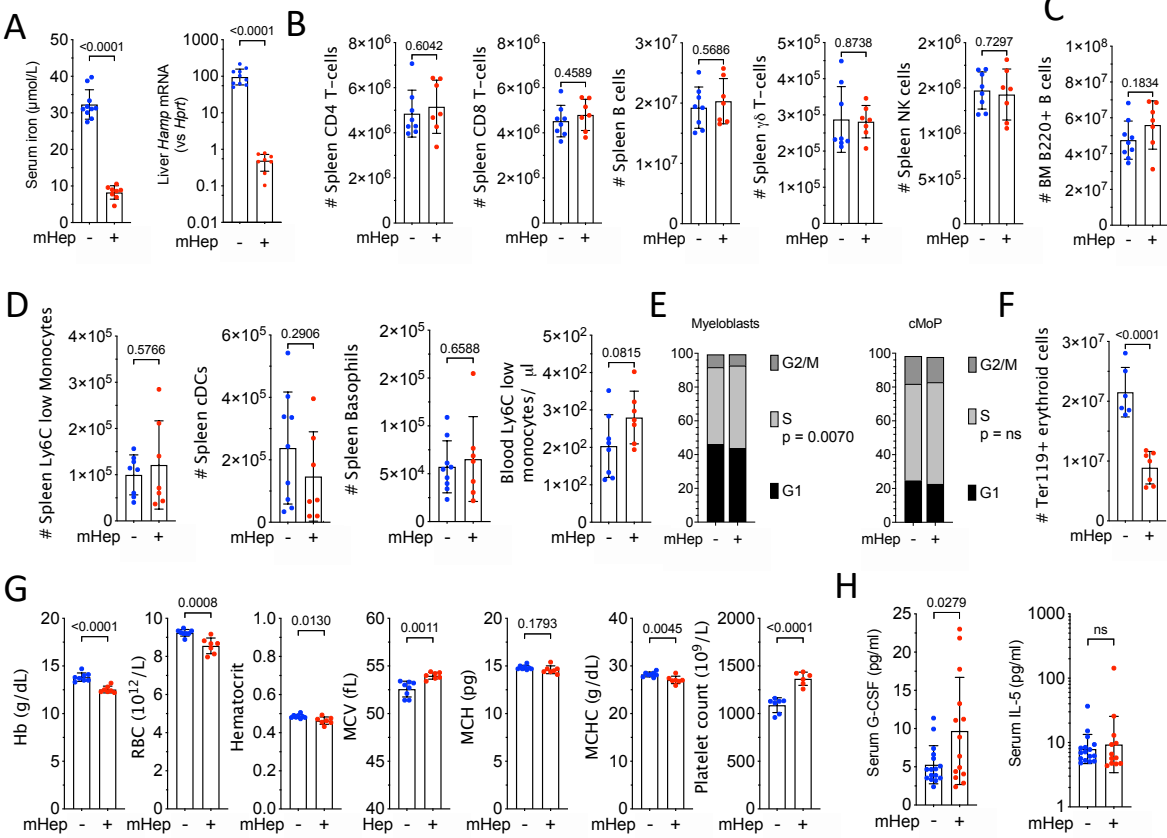

Figure S1

- A) Serum iron and liver hepcidin mRNA in experiment described in Fig 1C, Representative of two independent experiments. Unpaired T-test. Serum iron, mean  $\pm$  SD. Hepcidin mRNA, geometric mean  $\pm$  geometric SD.
- B) Number of splenic lymphocyte in experiment described in Fig 1C. Representative of two independent experiments. Unpaired T-test. Mean  $\pm$  SD.
- C) Number of B220+ B cells in the bone marrow in experiment described in Fig 1C. Unpaired T-test. Mean  $\pm$  SD.
- D) Number of specified splenic and blood myeloid cells in experiment described in Fig 1C. Representative of two independent experiments. Unpaired T-test. Mean  $\pm$  SD.
- E) Cell cycle distribution of myeloblast and cMoP in experiment described in Fig 1C. Representative of two independent experiments. Two way ANOVA, mean proportions of the whole.
- F) Number of Ter119+ erythroid cells in the bone marrow in experiment described in Fig 1C. Unpaired T-test. Mean  $\pm$  SD.
- G) Red cell indices and platelet count were measured by sysmex in experiment described in Fig 1C. Unpaired T-test. Mean  $\pm$  SD.
- H) Serum G-CSF and IL-5 were measured by Luminex in experiment described in Fig 1C. 2-way ANOVA blocking on experimental repeat and reporting p-value treatment effect, combination of two independent experiments. G-CSF, mean  $\pm$  SD. IL-5, geometric mean  $\pm$  geometric SD.

Figure S2

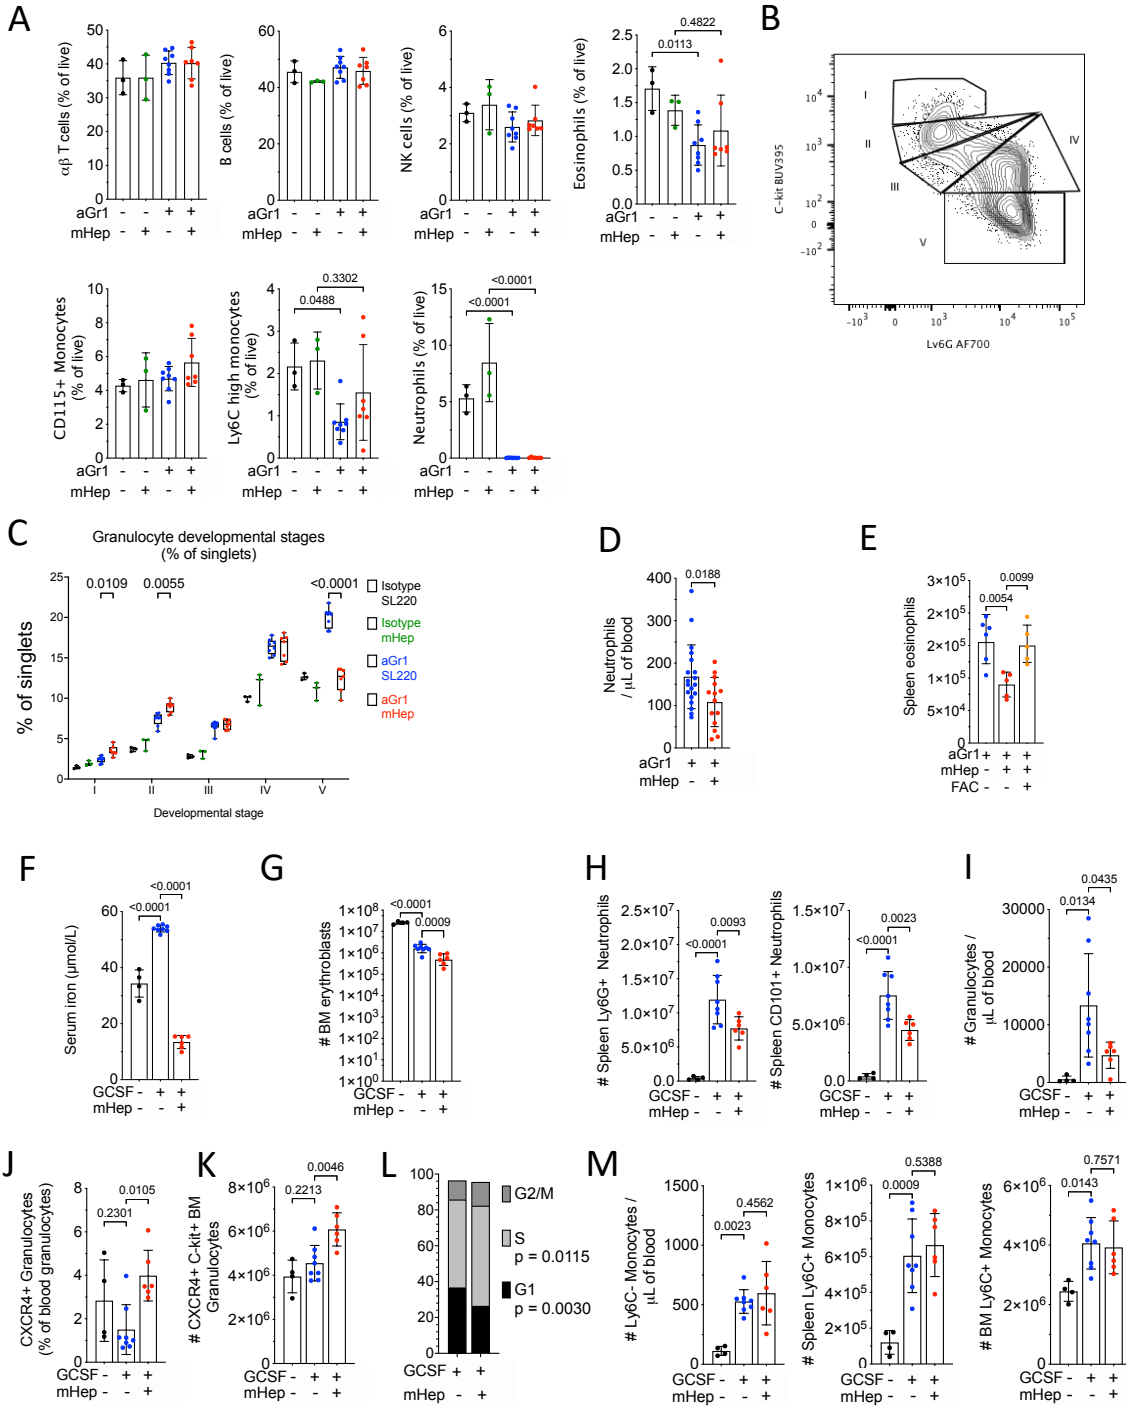

Figure S2

- A) Frequency of blood leukocyte subsets as a % of live events 24hrs after 10 $\mu$ g of aGr1 or isotype control as part of experiment outlined in Fig 2A. Two way ANOVA. Mean  $\pm$  SD
- B) Gating scheme to delineate stages of granulocyte differentiation (gated on Ly6C+, CD11b+, CD115- cells) in Fig 2B. From stage I (myeloblasts) to stage IV (mature neutrophils).
- C) Bone marrow granulocyte differentiation trajectory in mice treated as in Fig S2A, representative to two independent experiments. Two way ANOVA. Mean, quartiles and range.
- D) Blood neutrophil numbers in mice treated as in scheme 2A (combined from three independent experiments). Unpaired T-test. Mean  $\pm$  SD
- E) Spleen Eosinophil numbers in mice treated as in scheme 2C. One way ANOVA. Mean  $\pm$  SD
- F) Serum iron concentrations in experiment scheme 2E. One way ANOVA. Mean  $\pm$  SD
- G) Bone marrow CD71+ TER119+ erythroblast numbers in scheme 2E. One way ANOVA. Geo Mean  $\pm$  GeoSD
- H) Spleen Neutrophil numbers in experiment scheme 2E. One way ANOVA. Mean  $\pm$  SD
- I) Blood Ly6C int CD11b+ granulocyte numbers in experiment scheme 2E. One way ANOVA. Mean  $\pm$  SD
- J) % of granulocytes showing an immature CXCR4+ phenotype in experiment scheme 2E. One way ANOVA. Mean  $\pm$  SD
- K) Number of Bone marrow CXCR4+ c-kit+ neutrophil progenitors in experiment scheme 2E. One way ANOVA. Mean  $\pm$  SD
- L) Cell cycle distribution of CXCR4+ c-kit+ neutrophil progenitors in experiment scheme 2E. Two way ANOVA. Mean proportion of whole.
- M) Monocyte numbers in blood, spleen and bone marrow in experiment scheme 2E. One way ANOVA. Mean  $\pm$  SD

Figure S3 Functionality of myeloid cells in serum iron deficiency

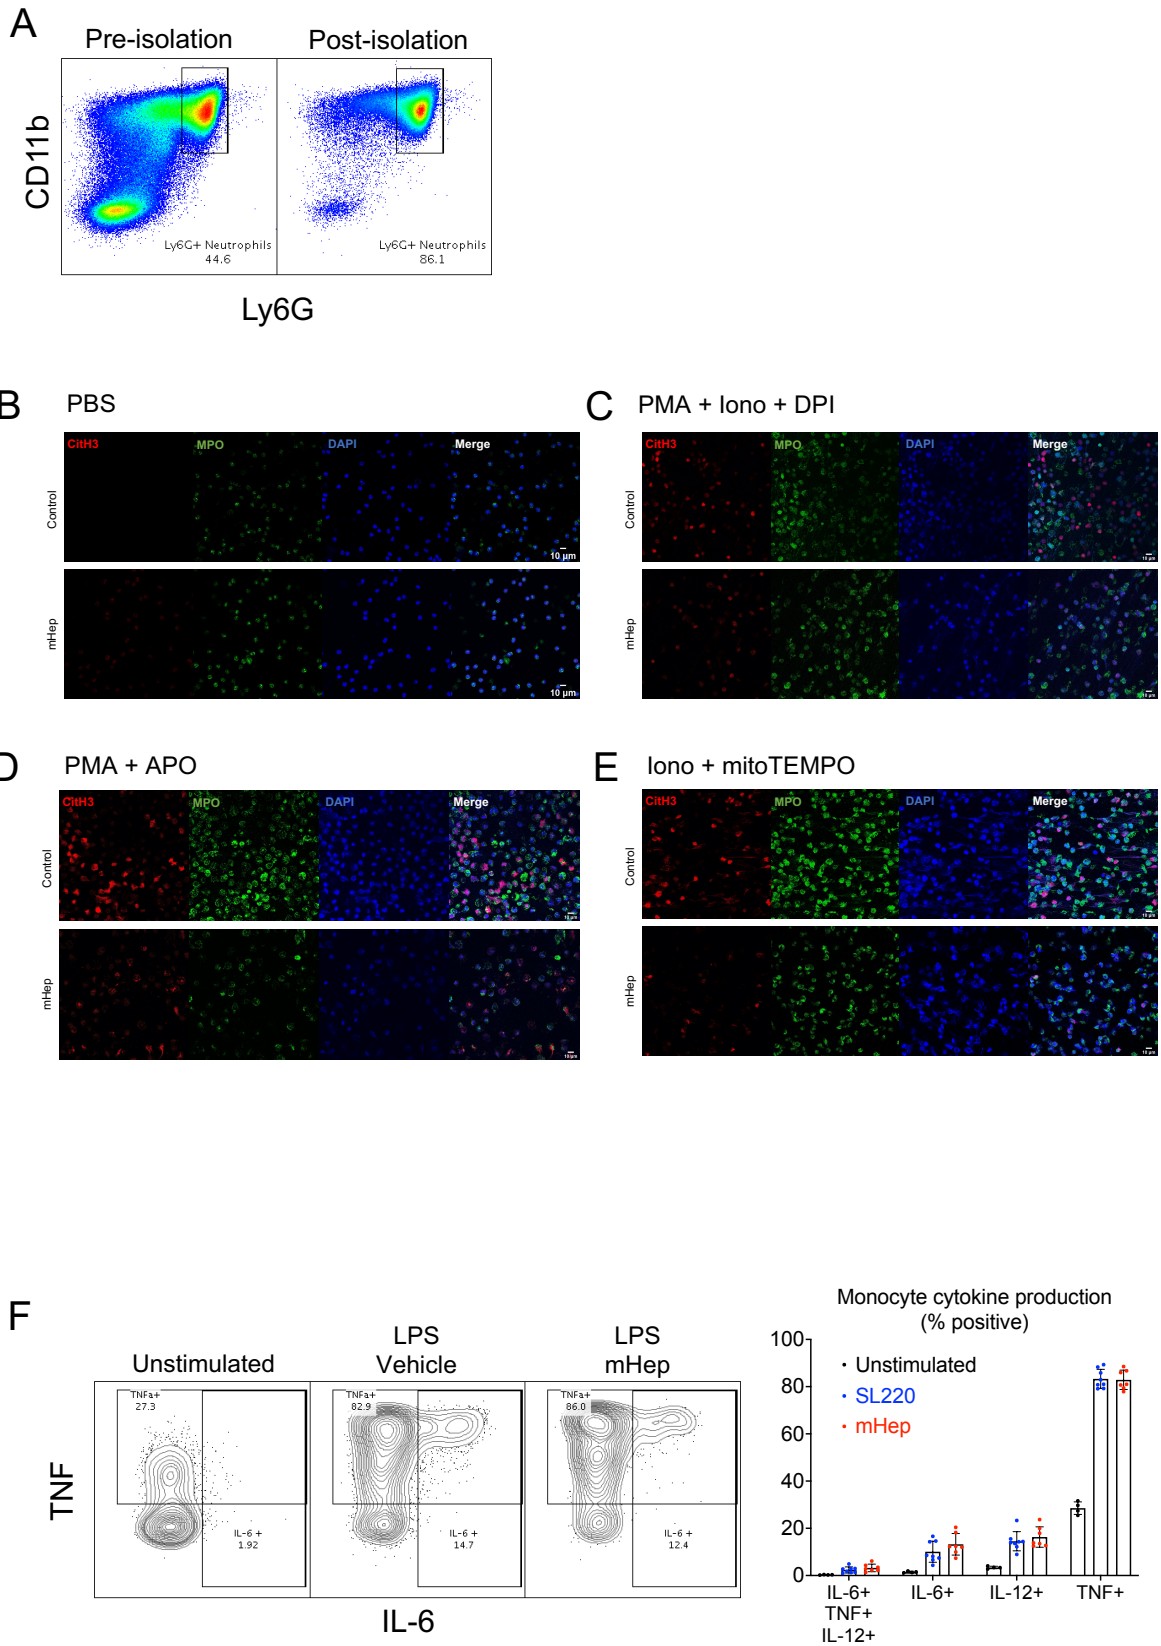

Figure S3

A) Enrichment purity of bone marrow Ly6G<sup>+</sup> neutrophils (obtained from mice treated as in experiment scheme Fig 2A)

(B-E) Representative microscopy images of NETosis taken at 20X for the following conditions:

B) PBS treatment

C) PMA, Ionomycin and DPI

D) PMA and apocyanin (APO)

E) Ionomycin and mitoTEMPO

F) Intracellular cytokine staining within Ly6C<sup>+</sup> CD11b<sup>+</sup> monocytes after *ex vivo* LPS stimulation of whole splenocytes from mice treated as in experiment scheme 1C. One way ANOVA. Mean  $\pm$  SD

## Figure S4 Counteracting inflammatory hepcidin induction improves neutrophil production

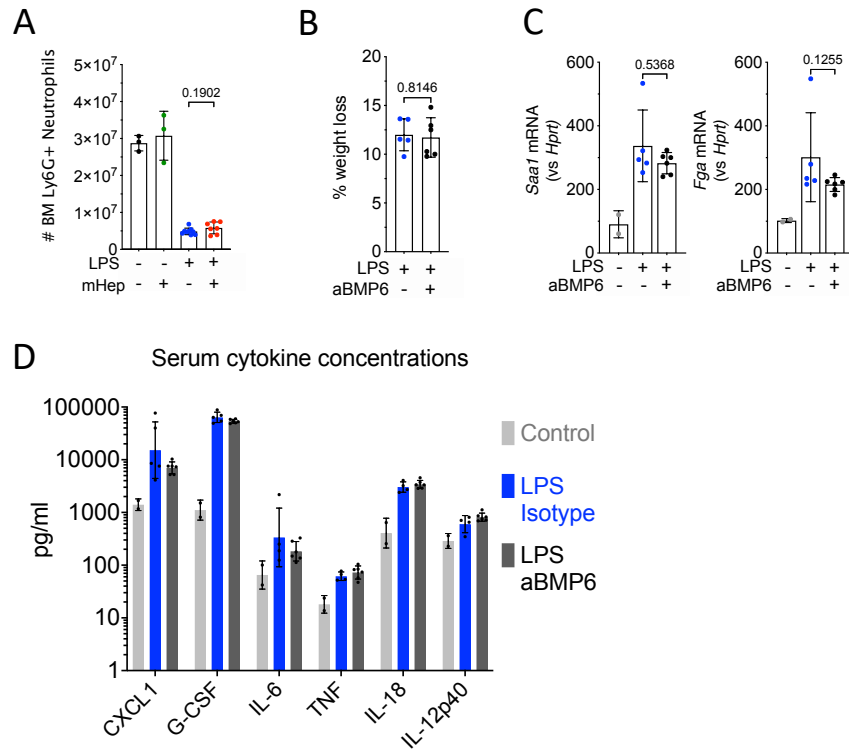

Figure S4

- A) BM neutrophil numbers from mice treated as in 4A. t-test. Mean ± SD.
- B) LPS induced weight loss from mice treated as in 4C. t-test. Mean ± SD. Representative of three independent experiments
- C) Liver *Saa1* and *Fga* expression (Mann-Whitney test) from mice treated as in 4C. Mean ± SD. Non LPS treated control group was treated with aGr1 24hrs prior to culling to reflect the systemic iron environment prior to LPS injection. Representative of two independent experiments.
- D) Serum cytokines measured by Legendplex from mice treated as in 4C. Mixed-effects model. Geometric Mean ± Geo SD.

| <b>Table S1. Flow cytometry antibodies used in the publication</b> |                        |              |                           |                         |             |
|--------------------------------------------------------------------|------------------------|--------------|---------------------------|-------------------------|-------------|
| <b>Conjugation</b>                                                 | <b>Marker</b>          | <b>Clone</b> | <b>Supplier</b>           | <b>Catalogue number</b> | <b>RRID</b> |
| AF700                                                              | IgD                    | 11-26c.2a    | BioLegend                 | 405729                  | AB_2563340  |
| AF700                                                              | Ly6G                   | 1A8          | BioLegend                 | 127621                  | AB_10640452 |
| AF700                                                              | CD4                    | GK1.5        | BioLegend                 | 100429                  | AB_493698   |
| APC                                                                | IL-12/IL-23 p40        | C15.6        | BioLegend                 | 505205                  | AB_315369   |
| APC                                                                | CD115                  | AFS98        | BioLegend                 | 135509                  | AB_2085222  |
| APC                                                                | CX3CR1                 | SA011F11     | BioLegend                 | 149007                  | AB_2564491  |
| APC                                                                | Ly6G                   | 1A8          | BioLegend                 | 127613                  | AB_1877163  |
| APC                                                                | Nk1.1                  | PK136        | BioLegend                 | 108709                  | AB_313396   |
| APC                                                                | I-A/I-E (MHC class II) | M5/114.15.2  | BioLegend                 | 107613                  | AB_313328   |
| APCcy7                                                             | CD90.2                 | 30-H12       | BioLegend                 | 105327                  | AB_10613280 |
| APCcy7                                                             | B220                   | RA3-6B2      | BioLegend                 | 103224                  | AB_313007   |
| APCcy7                                                             | CD11b                  | M1/70        | BioLegend                 | 101226                  | AB_830642   |
| APCcy7                                                             | CD19                   | 6D5          | BioLegend                 | 115529                  | AB_830706   |
| APCcy7                                                             | Ly6C                   | HK1.1        | BioLegend                 | 128025                  | AB_10643867 |
| APCcy7                                                             | Ly6G                   | 1A8          | BioLegend                 | 127623                  | AB_10645331 |
| APCcy7                                                             | NK1.1                  | PK136        | BioLegend                 | 108723                  | AB_830870   |
| APCcy7                                                             | Ter119                 | TER-119      | BioLegend                 | 116223                  | AB_2137788  |
| Biotin                                                             | CD115                  | AFS98        | BioLegend                 | 135507                  | AB_2028401  |
| Biotin                                                             | CD123                  | 5B11         | BioLegend                 | 106003                  | AB_2124404  |
| Biotin                                                             | CD71                   | RI7217       | BioLegend                 | 113803                  | AB_313564   |
| Biotin                                                             | CXCR4                  | 2B11         | Invitrogen<br>eBioscience | 13-9991-80              | AB_10609202 |
| Biotin                                                             | CD115                  | AFS98        | BioLegend                 | 135507                  | AB_2028401  |
| <i>BUV395<br/>Streptavidin</i>                                     |                        |              | <i>BD Biosciences</i>     | <i>564176</i>           | AB_2869553  |
| BUV496                                                             | B220                   | RA3-6B2      | BD Biosciences            | 612950                  | AB_2870227  |
| BUV805                                                             | CD8a                   | 53-6.7       | BD Biosciences            | 612898                  | AB_2870186  |
| BV421                                                              | c-kit                  | 2B8          | BioLegend                 | 105827                  | AB_10898120 |
| BV421                                                              | CD11b                  | M1/70        | BioLegend                 | 101235                  | AB_10897942 |
| BV510                                                              | CD11b                  | M1/70        | BioLegend                 | 101245                  | AB_2561390  |
| BV605                                                              | B220                   | RA3-6B2      | BioLegend                 | 103243                  | AB_11203907 |
| BV605                                                              | Ly6C                   | HK1.4        | BioLegend                 | 128035                  | AB_2562352  |
| BV605                                                              | CD8a                   | 53-6.7       | BioLegend                 | 100743                  | AB_2561352  |
| BV785                                                              | CD11b                  | M1/70        | BioLegend                 | 101243                  | AB_2561373  |
| FITC                                                               | CD11b                  | M1/70        | BioLegend                 | 101205                  | AB_312788   |
| FITC                                                               | CD45                   | 30-F11       | BioLegend                 | 103107                  | AB_312972   |
| FITC                                                               | Ly6C                   | HK1.4        | BioLegend                 | 128005                  | AB_1186134  |
| FITC                                                               | TNFa                   | MP6-XT22     | BioLegend                 | 506303                  | AB_315424   |



| Conjugation | Marker              | Clone       | Supplier   | Catalogue number | RRID        |
|-------------|---------------------|-------------|------------|------------------|-------------|
| FITC        | TCR $\beta$ chain   | H57-597     | BioLegend  | 109205           | AB_313428   |
| PE          | CD16/32             | 93          | BioLegend  | 101307           | AB_312806   |
| PE          | CXCR4               | 2B11        | Invitrogen | 12-9991-82       | AB_891391   |
| PE          | FLT-3               | A2F10       | BioLegend  | 135305           | AB_1877218  |
| PE          | IL-6                | MP5-20F3    | BioLegend  | 504503           | AB_315337   |
| PE          | Ly6G                | 1A8         | BioLegend  | 127607           | AB_1186104  |
| PE          | Siglec F            | S17007L     | BioLegend  | 155505           | AB_2750234  |
| PE          | Siglec H            | 551         | BioLegend  | 129605           | AB_1227763  |
| PECy7       | C-kit               | 2B8         | BioLegend  | 105813           | AB_313222   |
| PECy7       | CD101               | Moushi101   | invitrogen | 25-1011-80       | AB_2573378  |
| PECy7       | CD11c               | N418        | BioLegend  | 117317           | AB_493569   |
| PECy7       | CD49b               | HMa2        | BioLegend  | 103517           | AB_2566102  |
| PECy7       | Ly6C                | HK1.4       | BioLegend  | 128017           | AB_1732093  |
| PECy7       | Sca-1               | D7          | BioLegend  | 108113           | AB_493597   |
| PECy7       | TCR $\gamma/\delta$ | GL3         | BioLegend  | 118123           | AB_11203530 |
| PE/dazzle   | CXCR2               | SA044G4     | BioLegend  | 149317           | AB_2750072  |
| PE/dazzle   | FcER1a              | Mar-01      | BioLegend  | 134331           | AB_2687240  |
| PE/dazzle   | Ly6G                | 1A8         | BioLegend  | 127647           | AB_2566318  |
| PE/dazzle   | Siglec F            | S17007L     | BioLegend  | 155529           | AB_2890716  |
| PerCPCy5.5  | Ly6G                | 1A8         | BioLegend  | 127615           | AB_1877272  |
| PerCPCy5.5  | B220                | RA3-6B2     | BioLegend  | 103235           | AB_893356   |
| PerCPCy5.5  | CD16/32             | 93          | BioLegend  | 101323           | AB_1877268  |
| PerCPCy5.5  | MHC-II              | M5/114.15.2 | BioLegend  | 107625           | AB_2191072  |
| PerCPCy5.5  | Ter119              | TER-119     | BioLegend  | 116227           | AB_893638   |
| PB          | CD44                | IM7         | BioLegend  | 103019           | AB_493682   |
